# Supplementary material for: Genomic Analysis of Milk Protein Fractions in Brown Swiss Cattle
Source: PubMed Central journal article supplement (PMC7070934; doi:10.3390/ani10020336), 2020-02-20
Supplement: animals-10-00336-s001.pdf [file animals-10-00336-s001.pdf]

Supplementary information

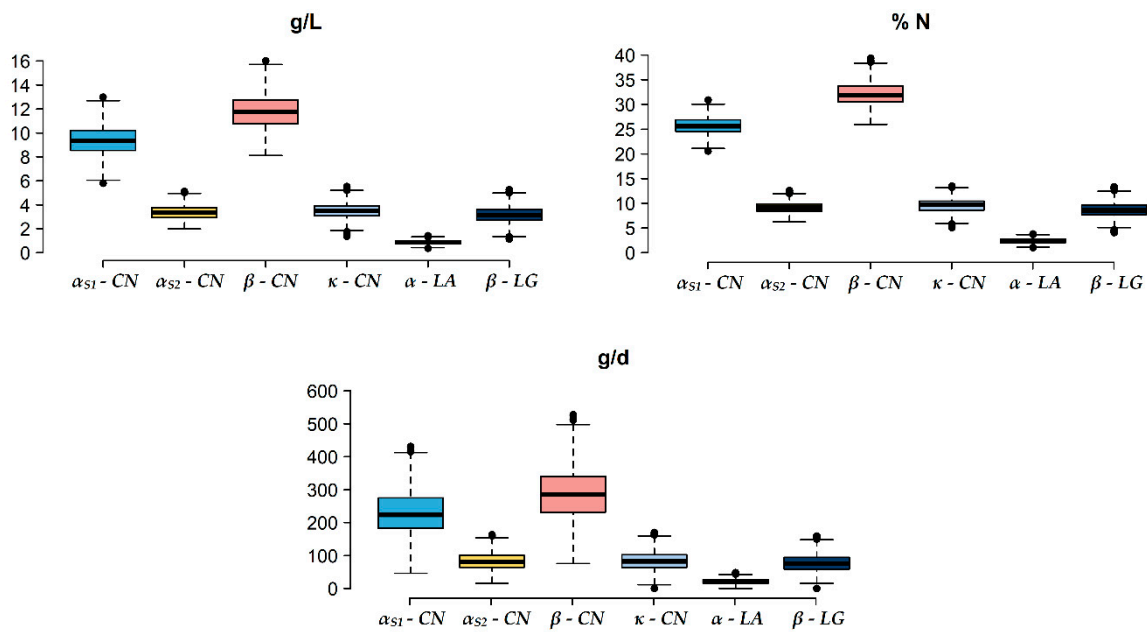

**Figure S1.** Boxplot of the phenotypic values for milk protein fractions casein fractions ( $\alpha_{s1}$ ,  $\alpha_{s2}$ ,  $\beta$ , and  $\kappa$  - CN) and whey proteins ( $\alpha$  - LA and  $\beta$  - LG) expressed as i) gram per liter of milk (g/L); ii) percentage of total milk nitrogen content (%N) and iii) gram secreted per day (g/d) after phenotypic control.

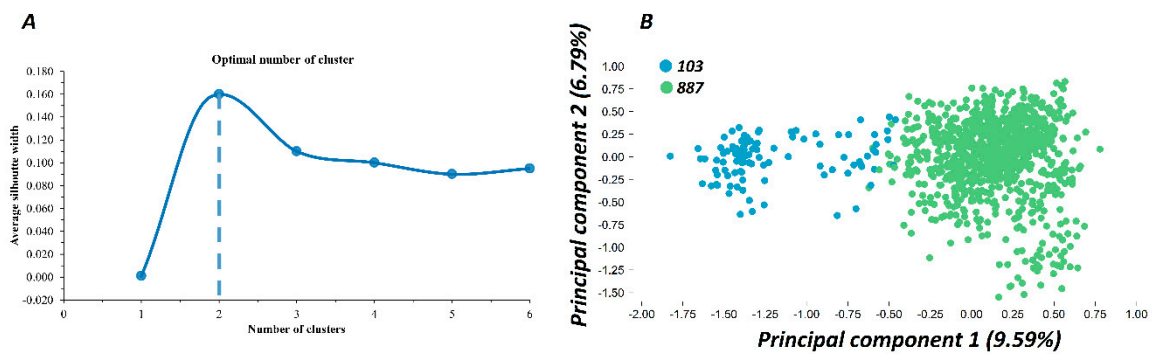

**Figure S2.** (A) Number of k clusters to identify the population structure and (B) A principal components analysis revealed two breeding subgroups of Brown Swiss cattle based on the genomic kinship coefficient.

**Table S1.** Estimates of environmental correlation for milk protein fractions using genomic information.

| <i>Protein fractions contents (g/L)</i>    |    |                      |                   |               |               |               |               |
|--------------------------------------------|----|----------------------|-------------------|---------------|---------------|---------------|---------------|
|                                            | MY | $\alpha_{S1}$ -CN    | $\alpha_{S2}$ -CN | $\beta$ -CN   | $\kappa$ -CN  | $\alpha$ -LA  | $\beta$ -LG   |
| MY                                         | -  | <b>-0.36</b> (0.005) | -0.27 (0.003)     | -0.25 (0.005) | -0.20 (0.001) | -0.03 (0.003) | -0.32 (0.005) |
| $\alpha_{S1}$ -CN                          |    | -                    | 0.47 (0.050)      | 0.63 (0.045)  | 0.31 (0.055)  | 0.24 (0.066)  | 0.56 (0.033)  |
| $\alpha_{S2}$ -CN                          |    |                      | -                 | 0.50 (0.045)  | 0.23 (0.071)  | 0.33 (0.071)  | 0.55 (0.043)  |
| $\beta$ -CN                                |    |                      |                   | -             | -0.48 (0.031) | 0.27 (0.046)  | 0.44 (0.045)  |
| $\kappa$ -CN                               |    |                      |                   |               | -             | -0.24 (0.032) | 0.31 (0.028)  |
| $\alpha$ -LA                               |    |                      |                   |               |               | -             | 0.39 (0.037)  |
| $\beta$ -LG                                |    |                      |                   |               |               |               | -             |
| <i>Protein fractions proportion (%N)</i>   |    |                      |                   |               |               |               |               |
|                                            | CP | $\alpha_{S1}$ -CN    | $\alpha_{S2}$ -CN | $\beta$ -CN   | $\kappa$ -CN  | $\alpha$ -LA  | $\beta$ -LG   |
| CP                                         | -  | <b>0.04</b> (0.002)  | 0.15 (0.001)      | -0.21 (0.006) | 0.08 (0.009)  | -0.10 (0.008) | 0.05 (0.005)  |
| $\alpha_{S1}$ -CN                          |    | -                    | 0.23 (0.077)      | -0.19 (0.012) | 0.38 (0.063)  | 0.02 (0.036)  | 0.13 (0.060)  |
| $\alpha_{S2}$ -CN                          |    |                      | -                 | -0.29 (0.014) | 0.27 (0.046)  | 0.15 (0.023)  | 0.29 (0.053)  |
| $\beta$ -CN                                |    |                      |                   | -             | -0.15 (0.012) | 0.04 (0.048)  | -0.19 (0.020) |
| $\kappa$ -CN                               |    |                      |                   |               | -             | -0.01 (0.011) | -0.12 (0.026) |
| $\alpha$ -LA                               |    |                      |                   |               |               | -             | 0.28 (0.056)  |
| $\beta$ -LG                                |    |                      |                   |               |               |               | -             |
| <i>Protein fractions daily yield (g/d)</i> |    |                      |                   |               |               |               |               |
|                                            | -  | $\alpha_{S1}$ -CN    | $\alpha_{S2}$ -CN | $\beta$ -CN   | $\kappa$ -CN  | $\alpha$ -LA  | $\beta$ -LG   |
| $\alpha_{S1}$ -CN                          | -  | -                    | 0.84 (0.004)      | 0.93 (0.015)  | 0.82 (0.003)  | 0.79 (0.012)  | 0.85 (0.003)  |
| $\alpha_{S2}$ -CN                          |    |                      | -                 | 0.83 (0.019)  | 0.69 (0.005)  | 0.73 (0.009)  | 0.81 (0.010)  |
| $\beta$ -CN                                |    |                      |                   | -             | -0.83 (0.029) | 0.79 (0.009)  | 0.83 (0.076)  |
| $\kappa$ -CN                               |    |                      |                   |               | -             | 0.70 (0.004)  | 0.73 (0.003)  |
| $\alpha$ -LA                               |    |                      |                   |               |               | -             | 0.76 (0.017)  |
| $\beta$ -LG                                |    |                      |                   |               |               |               | -             |

CP: Crude protein (g/L); MY: Milk yield (kg/d); CN: Casein;  $\beta$ -LG:  $\beta$  - lactoglobulin;  $\alpha$ -LA:  $\alpha$  - lactalbumin; g/d: Grams of protein secreted per day; %N: Percentage of nitrogen; g/L: Grams per L of milk.

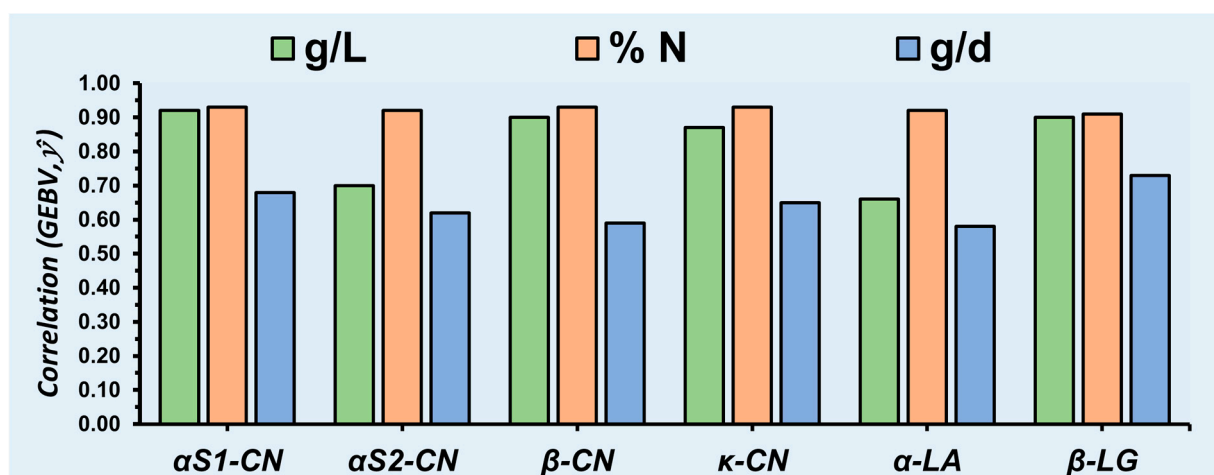

**Figure S3.** Predictive ability assessed in the multi-trait model by Pearson's correlations between genomic breeding values (GEBV) and adjusted phenotypes ( $y^*$ ) for milk protein fractions expressed as grams per liter of milk (g/L), percentage of nitrogen (%N) and grams per day (g/d).
